# Supplementary material for: Changes in Overall Survival Over Time for Patients With de Novo Metastatic Breast Cancer
Source: Preprints.org preprint supplement (doi:10.20944/preprints202105.0093.v1), 2021-05-06

**SUPPLEMENTARY FIGURES**

**Supplemental Figure 1.** Kaplan-Meier curve of overall survival for all dnMBC patients


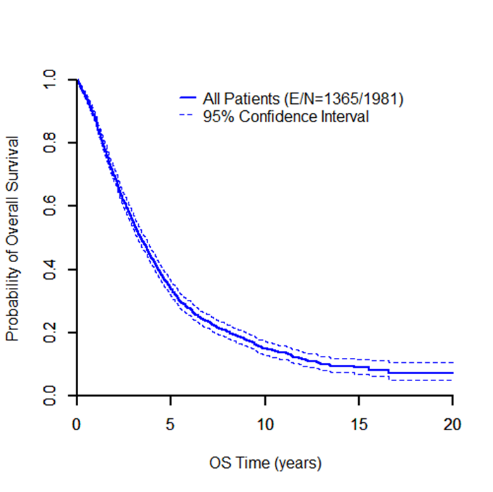


**Supplemental Figure 2.**

**A.** Kaplan-Meier curve of overall survival stratified by IBC


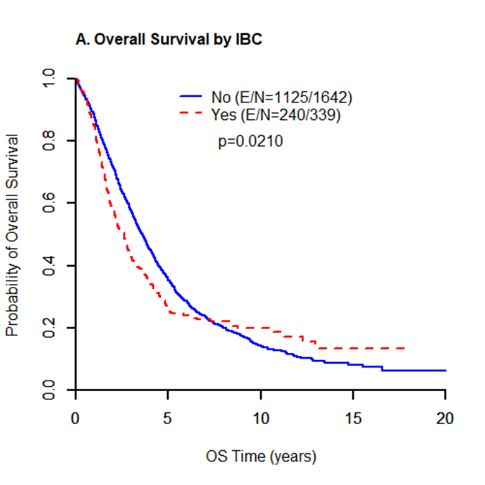


**B.** Kaplan-Meier curve of overall survival stratified by ER


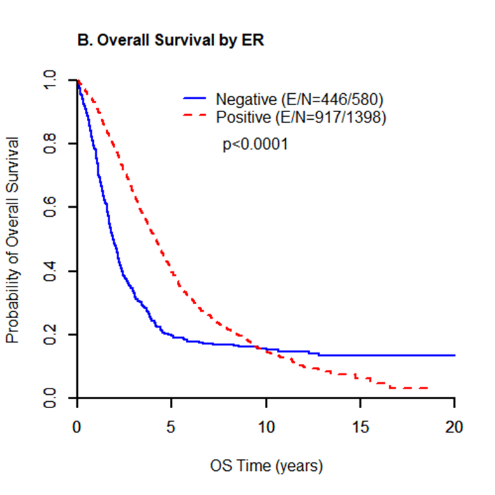


**C.** Kaplan-Meier curve of overall survival stratified by PR


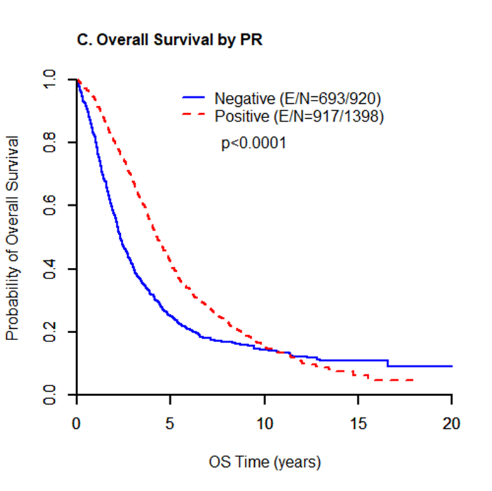


**D.** Kaplan-Meier curve of overall survival stratified by HER2


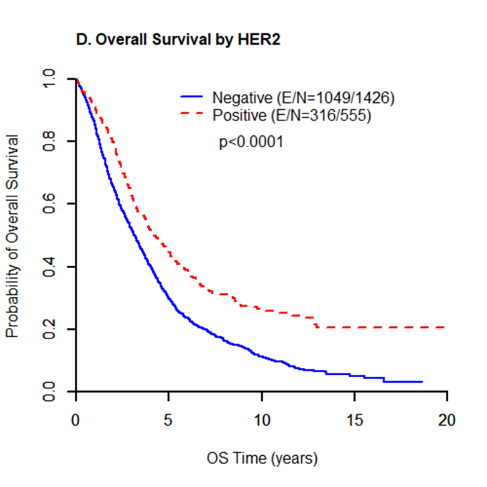


**E.** Kaplan-Meier curve of overall survival stratified by subtypes


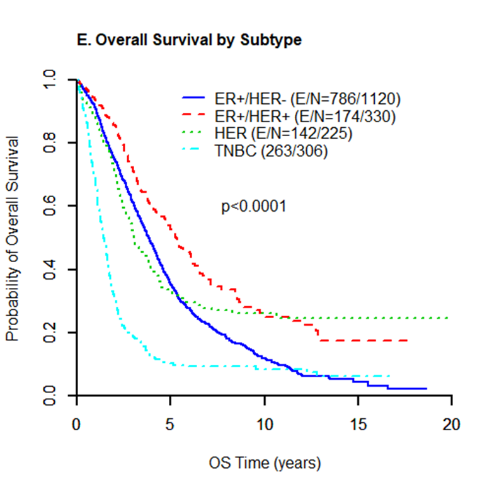


**F.** Kaplan-Meier curve of overall survival stratified by grade


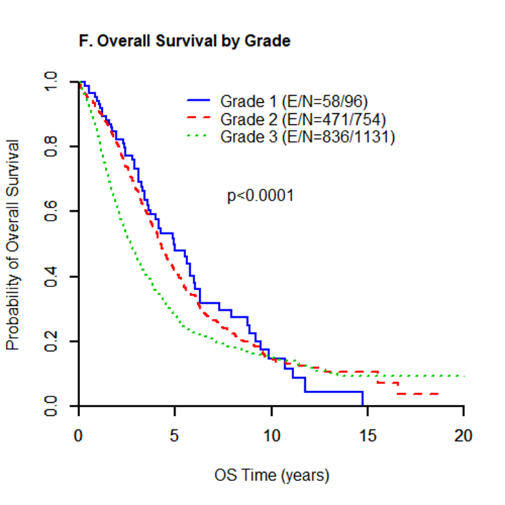


**G.** Kaplan-Meier curve of overall survival stratified by the locoregional therapy


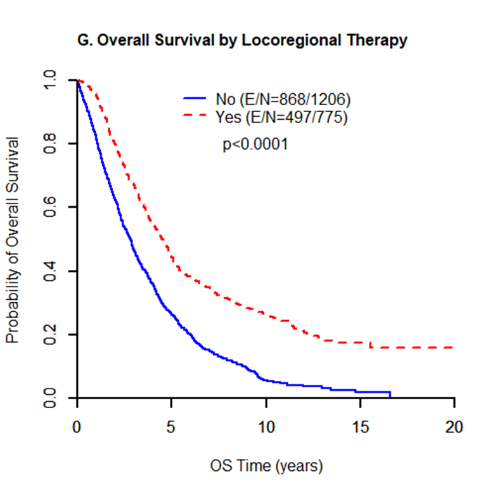


**H.** Kaplan-Meier curve of overall survival stratified by single or multiple organ metastasis


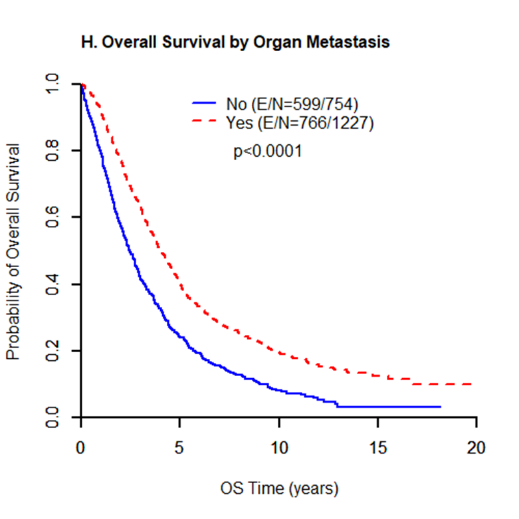

Supplement: Supplementary file 1 [file supplementary]
